# Supplementary material for: Depletion of globosides and isoglobosides fully reverts the morphologic phenotype of Fabry disease
Source: PubMed Central journal article supplement (PMC4186980; doi:10.1007/s00441-014-1922-9), 2014-07-04
Supplement: 441_2014_1922_MOESM1_ESM.pdf [file 441_2014_1922_MOESM1_ESM.pdf]

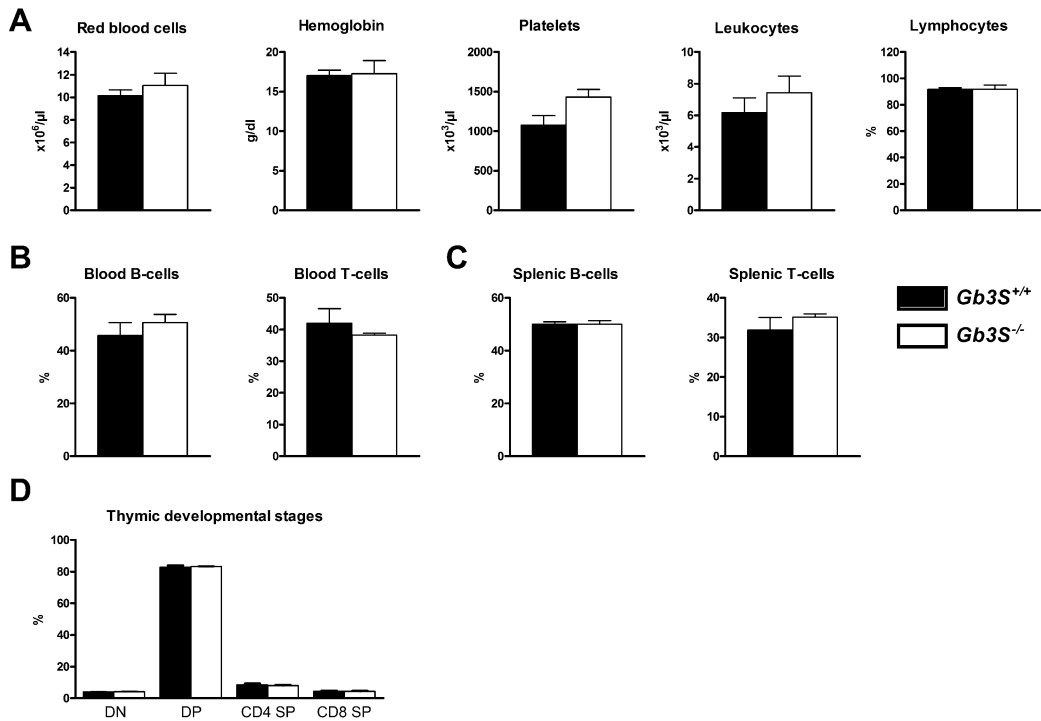

**Electronic Supplementary Material, Figure S1: Analysis of peripheral blood, spleen and thymus in *Gb3*-deficient mice.**

Peripheral blood (A-B), spleen (C) and thymus (D) were analyzed by flow cytometry. No statistically significant differences between WT and *Gb3*-deficient mice could be observed in any of the parameters investigated. Bars represent means, depicted are standard errors of means,  $n = 3-4$ . DN, double negative ( $CD4^-/CD8^-$ ); DP, double positive ( $CD4^+/CD8^+$ ); SP, single positive.
